# Supplementary material for: A novel species of torque teno mini virus (TTMV) in gingival tissue from chronic periodontitis patients
Source: PubMed Central journal article supplement (PMC4879676; doi:10.1038/srep26739), 2016-05-25
Supplement: srep26739-s1.pdf [file srep26739-s1.pdf]

# **A novel species of torque teno mini virus (TTMV) in gingival tissue from chronic periodontitis patients**

Yu Zhang, Fei Li, Tong-Ling Shan, Xutao Deng, Eric Delwart ,Xi-Ping Feng

**Table S1. % nucleotide similarity between ORF1 of different TTMV species for ORF1**

|            | 1    | 2    | 3    | 4    | 5    | 6    | 7    | 8    | 9    | 10 |
|------------|------|------|------|------|------|------|------|------|------|----|
| 1.TTMV-222 |      |      |      |      |      |      |      |      |      |    |
| 2.TTMV1    | 60.4 |      |      |      |      |      |      |      |      |    |
| 3.TTMV2    | 57.7 | 54.9 |      |      |      |      |      |      |      |    |
| 4.TTMV3    | 57.5 | 54.9 | 58.9 |      |      |      |      |      |      |    |
| 5.TTMV4    | 51.7 | 50.9 | 51.2 | 52.2 |      |      |      |      |      |    |
| 6.TTMV5    | 50.4 | 49.7 | 46.8 | 48.7 | 57.5 |      |      |      |      |    |
| 7.TTMV6    | 51.7 | 50.9 | 50.7 | 50.3 | 53.7 | 49.4 |      |      |      |    |
| 8.TTMV7    | 52.0 | 50.3 | 50.9 | 51.5 | 53.7 | 49.1 | 58.8 |      |      |    |
| 9.TTMV8    | 51.7 | 51.1 | 50.6 | 50.7 | 53.3 | 49.4 | 58.8 | 58.5 |      |    |
| 10.TTMV9   | 49.1 | 51.0 | 50.3 | 50.3 | 51.0 | 49.0 | 56.4 | 56.1 | 62.9 |    |

**Supplementary Table S2. Comparison of periodontitis and control groups.**

| Group | Periodontitis group<br>(mean ± SD) | Control group<br>(mean ± SD) | <i>P</i> |
|-------|------------------------------------|------------------------------|----------|
| Age   | 45.49 ± 11.81                      | 39.72 ± 11.19                | 0.674    |
| PD    | 9.25 ± 2.08                        | 2.15 ± 0.97                  | <0.001   |
| CAL   | 4.72 ± 0.97                        | 0.14 ± 0.18                  | <0.001   |
| GI    | 2.32 ± 0.43                        | 0.12 ± 0.17                  | <0.001   |
| PLI   | 2.58 ± 0.30                        | 0.27 ± 0.14                  | <0.001   |

Obtained by Student's *t*-test (two groups) .<sup>a</sup>*P*<0.05.

SD: standard deviation.PD: pocket depth.CAL: clinical attachment loss.GI: gingival index. PLI: plaque index.

**Supplementary Table S3. Comparison of periodontitis and control groups.**

| Group            | Periodontitis group | Control group | <i>P</i> |
|------------------|---------------------|---------------|----------|
|                  | N                   | N             |          |
| Gender           | 150                 | 150           |          |
| Male             | 70                  | 74            | 0.729    |
| Female           | 80                  | 76            |          |
| Frequency of BOP | 150                 | 150           |          |
| Positive         | 150                 | 53            | <0.001   |
| Negative         | 0                   | 97            |          |

Obtained by Chi-squared test. <sup>a</sup>*P*<0.05

BOP: bleeding on probing.
